# Supplementary material
Source: PubMed Central journal article supplement (PMC10659121)
Supplement: NIHMS1922910-supplement-1.pdf [file NIHMS1922910-supplement-1.pdf]

16  
17

Supplementary Figures

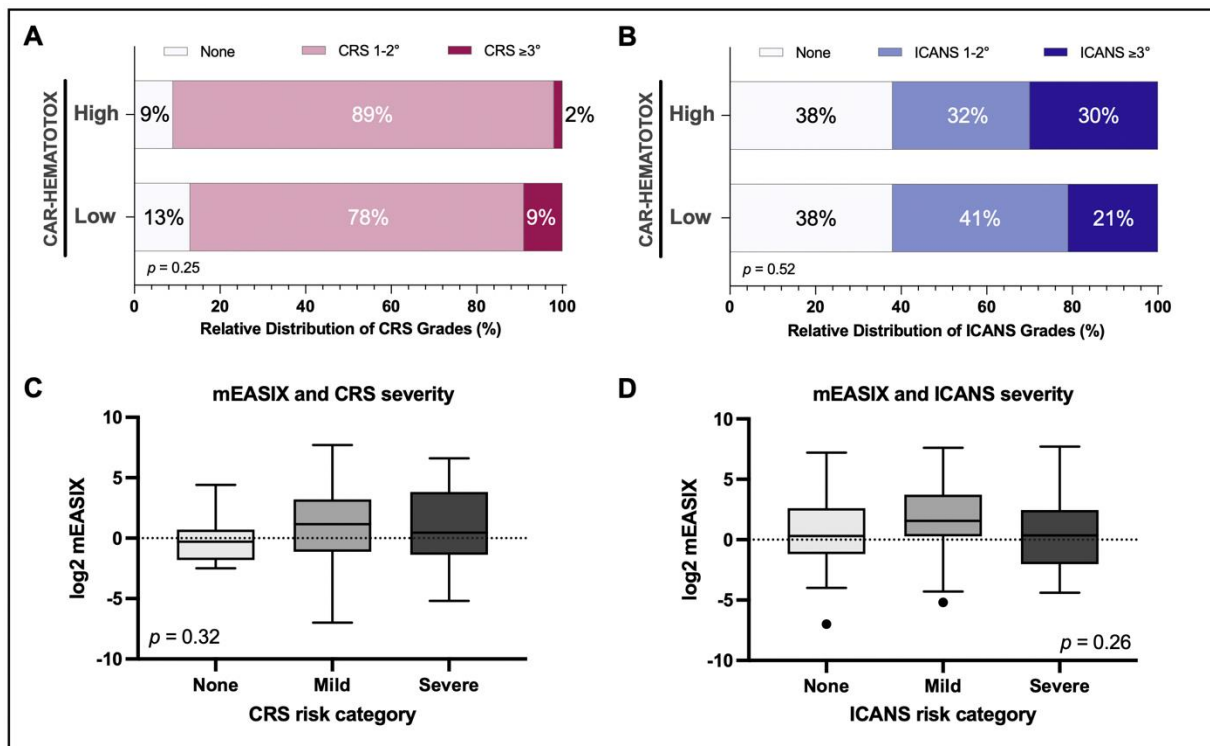

18 **Figure S1 Neither the CAR-HEMATOTOX score nor the modified EASIX score at**  
 19 **lymphodepletion were associated with the severity of CRS or ICANS**  
 20 **A-B** Relative distribution of CRS grades (A) and ICANS grades (B) according to ASTCT criteria by HT score.  
 21 **C-D** Log 2 transformed modified EASIX score (Pennisi et al Blood Advances 2021) by CRS (C) and ICANS  
 22 (D) risk category. Mild defined as ASTCT grade 1-2, severe defined as ASTCT grade ≥3. P-values determined  
 23 by Kruskal-Wallis test.  
 24  
 25  
 26  
 27

**Causes of Non-Relapse Mortality**

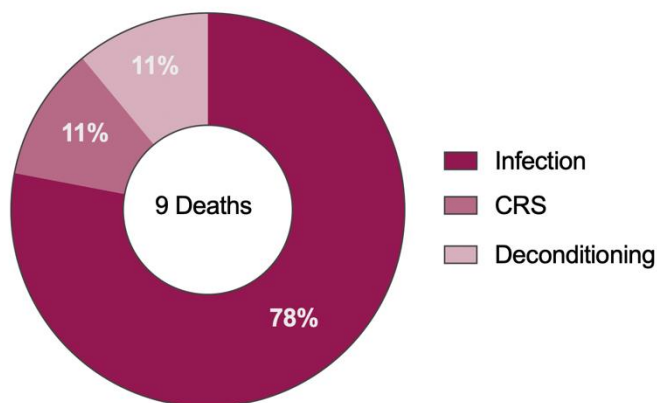

28 **Figure S2 Non-relapse mortality after brexu-cel infusion is driven by severe infections**  
 29 **Nine patients died of non-relapse mortality (NRM) related reasons during the entire study follow-up.**  
 30 **Pie chart depicts the distribution underlying causes of death.**  
 31

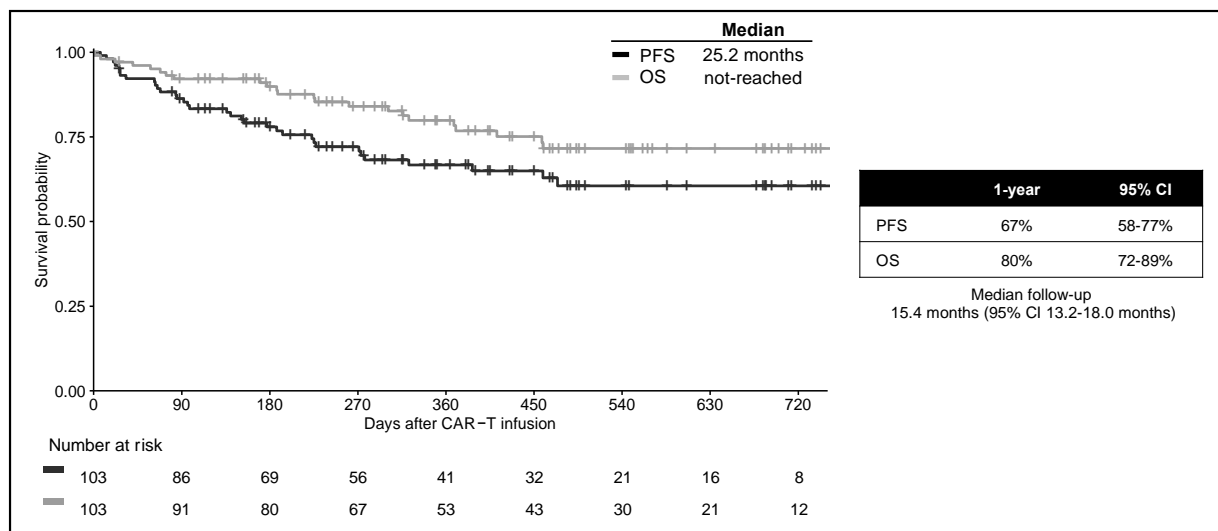

32 **Figure S3 Survival outcomes in r/r MCL patients treated with brexu-cel**  
 33 Kaplan-Meier estimates of progression-free survival (PFS, dark grey) and overall survival (OS, light grey).  
 34 Median PFS/OS and 1-year PFS/OS rate with 95% confidence intervals (Cis) are provided.  
 35
